# Supplementary material for: Identification of a prolonged action molecular GLP-1R agonist for the treatment of femoral defects
Source: Royal Society of Chemistry journal article supplement (doi:10.1039/c9bm01426h), 2020-01-01
Supplement: c9bm01426h1.pdf [file c9bm01426h1.pdf]

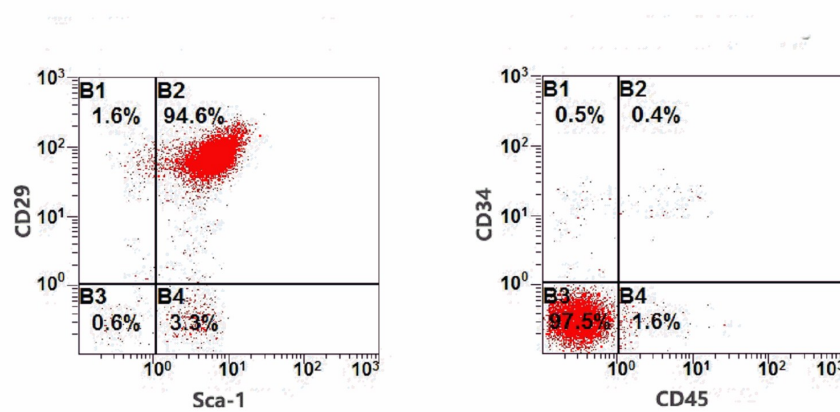

**Fig.S1: BMSCs were examined by Flow cytometry.** CD29, Sca-1 were the positive markers and CD34, CD45 were the negative markers of BMSCs.
